# Supplementary material
Source: Research Square preprint supplement (doi:10.21203/rs.3.rs-9466880/v1)
Supplement: Supplementary file 1 [file 4749529a39106469d56c129a.docx]

Table 1. Clinical characteristics of patients included in the multiplex IHC analysis

| **Case** | **Age** | **Sex** | **Tooth (FDI No.)** | **Cause of RCT** | **Time since**  **last RCT** | **Symptom**  **/Sign** | | **Lesion**  **Size (mm)** | **Quality of RCT**** | **Systemic**  **diseases** |
| --- | --- | --- | --- | --- | --- | --- | --- | --- | --- | --- |
| **Pain** | **Sinus track** |
| #1 | 19 | M | #11 | Dental trauma | 7 years | - | - | 12x11  x8.5 | Adequate | None |
| #2 | 65 | F | #23 | n/a | 2 years | - | - | 13x8x7 | Inadequate | Hypertension  Hyperlipidemia |
| #3 | 52 | F | #36 | Dental caries | > 10 years | - | - | 9.5x8.5  x6.5 | Inadequate | Hypertension  Hyperlipidemia |
| #4 | 22 | F | #21 | Incomplete RCT | 2 months | - | + | 9x8x8 | Inadequate | None |
| #5 | 42 | M | #22 | Dental caries | 10 years | + | - | 11x9x7 | Adequate | Thyroid cancer (10 years)  Kidney cancer  (1.5 years) |
| #6 | 48 | M | #25 | Dental caries | 10 years | - | - | 8.5x6x6 | Adequate | None |
| #7 | 51 | F | #22 | Esthetic  Prosthesis | > 10 years | - | - | 11x11  x11 | Adequate | Penicillin allergy |

* Abbreviation: RCT (Root Canal Treatment), FDI No. (FDI World Dental Federation notation), n/a (not available)

** The quality of the canal filling was considered adequate if the obturation had an appropriate density and finished within 2 mm of the apex on a periapical radiograph.

Table 2. Clinical characteristics of patients from whom *C. acnes* was isolated

| Patient Information | *C. acnes* D1 strain | *C. acnes* D2 strain |
| --- | --- | --- |
| Age | 69 years old | 36 years old |
| Sex | Male | Male |
| Systemic diseases | Hepatitis C, Hyperlipidemia | Unremarkable |
| Affected site (FDI No.) | i42, 41, 31 | #37 |
| History of  affected lesion | Implant placement and fixed bridge prosthesis  (about 15 years ago) | Root canal treatment and crown prosthesis  (about 10 years ago) |
| Clinical  Diagnosis | Peri-implantitis | Apical periodontitis  with vertical root fracture |
| Treatment | Removal of Implant fixture | Tooth Extraction |

Table 3. Clinical characteristics of patients enrolled for single-cell RNA sequencing

| **Case** | **Age** | **Sex** | **Tooth (FDI No.)** | **Cause of RCT** | **Last tx. (Type & duration)** | **Symptom**  **/Sign** | | **Lesion**  **Size (mm)** | **Quality of RCT**** | **Systemic**  **diseases** |
| --- | --- | --- | --- | --- | --- | --- | --- | --- | --- | --- |
| **Pain** | **Sinus track** |
| CAP 1 | 21 | F | #21 | Dental caries | 8 years (RCT) | - | - | 11x9x9 | Adequate | None |
| CAP 2 | 85 | M | #22 | Dental caries | 1 year  (RCT) | - | + | 7x7x6 | Adequate | Hypertension  Hyperlipidemia  Diabetes  Prostate disease |
| CAP 3 | 20 | F | #35 | Apical abscess | 6 months (RCT) | - | + | 9x9x8 | Adequate | None |
| CAP 4 | 31 | F | #21 | Dental caries | 3 years (Endodontic surgery) | - | + | 6x5x5 | Adequate | None |
| CAP 5 | 31 | F | #43 | Pulp necrosis | 8 months (RCT) | + | + | 12x12  x10 | Adequate | None |

* Abbreviation: RCT (Root Canal Treatment), FDI No. (FDI World Dental Federation notation), n/a (not available), tx. (Treatment)

** The quality of the canal filling was considered adequate if the obturation had an appropriate density and finished within 2 mm of the apex on a periapical radiograph.
