# Supplementary material
Source: Research Square preprint supplement (doi:10.21203/rs.3.rs-9466880/v1)
Supplement: Supplementary file 2 [file 6032e30593cdac4252d87baf.xlsx]

## Sheet: Lipid_Gene_Sets
FA_Transport_Uptake	CD36
	SLC27A1
	SLC27A2
	SLC27A3
	SLC27A4
	FABP3
	FABP4
	FABP5
	FABP7
	LPL
	GPIHBP1
	LDLR
	VLDLR
	LRP1
	SCARB1
FAO	CPT1A
	CPT1B
	CPT2
	SLC25A20
	ACADM
	ACADL
	ACADVL
	HADHA
	HADHB
	ECHS1
	ETFA
	ETFB
	ETFDH
	ACAA2
	DECR1
	EHHADH
	ACOX1
	ACOX2
	ACOX3
Lipogenesis_FA_Synthesis	ACLY
	ACACA
	ACACB
	FASN
	SCD
	SCD5
	ELOVL1
	ELOVL2
	ELOVL5
	ELOVL6
	ME1
	MLYCD
	THRSP
TG_Synthesis	GPAM
	AGPAT1
	AGPAT2
	AGPAT3
	AGPAT4
	LPIN1
	LPIN2
	DGAT1
	DGAT2
	PNPLA3
Lipid_Droplet_Storage	PLIN1
	PLIN2
	PLIN3
	PLIN4
	PLIN5
	CIDEC
	CIDEA
	FITM2
	BSCL2
	PNPLA2
	LIPE
Lipolysis	PNPLA2
	LIPE
	MGLL
	ABHD5
	G0S2
	CES1
	CES2
Cholesterol_Biosynthesis	HMGCS1
	HMGCR
	MVK
	PMVK
	MVD
	IDI1
	FDPS
	FDFT1
	SQLE
	LSS
	DHCR7
	DHCR24
	EBP
	SC5D
	NSDHL
	CYP51A1
Cholesterol_Efflux_Trafficking	ABCA1
	ABCG1
	APOE
	APOC1
	PLTP
	CETP
	NPC1
	NPC2
	SOAT1
	SOAT2
	SCARB1
Phospholipid_Remodeling	LPCAT1
	LPCAT2
	LPCAT3
	LPCAT4
	PLA2G4A
	PLA2G7
	PLA2G6
	CHKA
	PCYT1A
	PCYT1B
	CEPT1
Sphingolipid_Ceramide	SPTLC1
	SPTLC2
	KDSR
	CERS2
	CERS5
	CERS6
	DEGS1
	SGMS1
	SGMS2
	SMPD1
	ASAH1
	UGCG
Eicosanoid_AA	PLA2G4A
	PTGS1
	PTGS2
	ALOX5
	ALOX5AP
	ALOX12
	ALOX15
	LTA4H
	LTC4S
	PTGES
	PTGES2
	PTGDS
	HPGDS
Lipid_Regulators	SREBF1
	SREBF2
	PPARG
	PPARA
	PPARD
	NR1H3
	NR1H2
	RXRA
	INSIG1
	INSIG2
	SCAP
